# Supplementary material for: Encapsulation of Oleuropein in Nanostructured Lipid Carriers: Biocompatibility and Antioxidant Efficacy in Lung Epithelial Cells
Source: PubMed Central journal article supplement (PMC7285197; doi:10.3390/pharmaceutics12050429), 2020-05-06
Supplement: pharmaceutics-12-00429-s001.pdf [file pharmaceutics-12-00429-s001.pdf]

# Supplementary Materials: Encapsulation of Oleuropein in Nanostructured Lipid Carriers: Biocompatibility and Antioxidant Efficacy in Lung Epithelial Cells

Amaia Huguet-Casquero, Maria Moreno-Sastre, Tania Belén Lopez-Méndez, Eusebio Gainza and Jose Luis Pedraz

## S1. Nanoparticle Morphology and Success in Freeze-Drying Process of Blank Nanoparticles

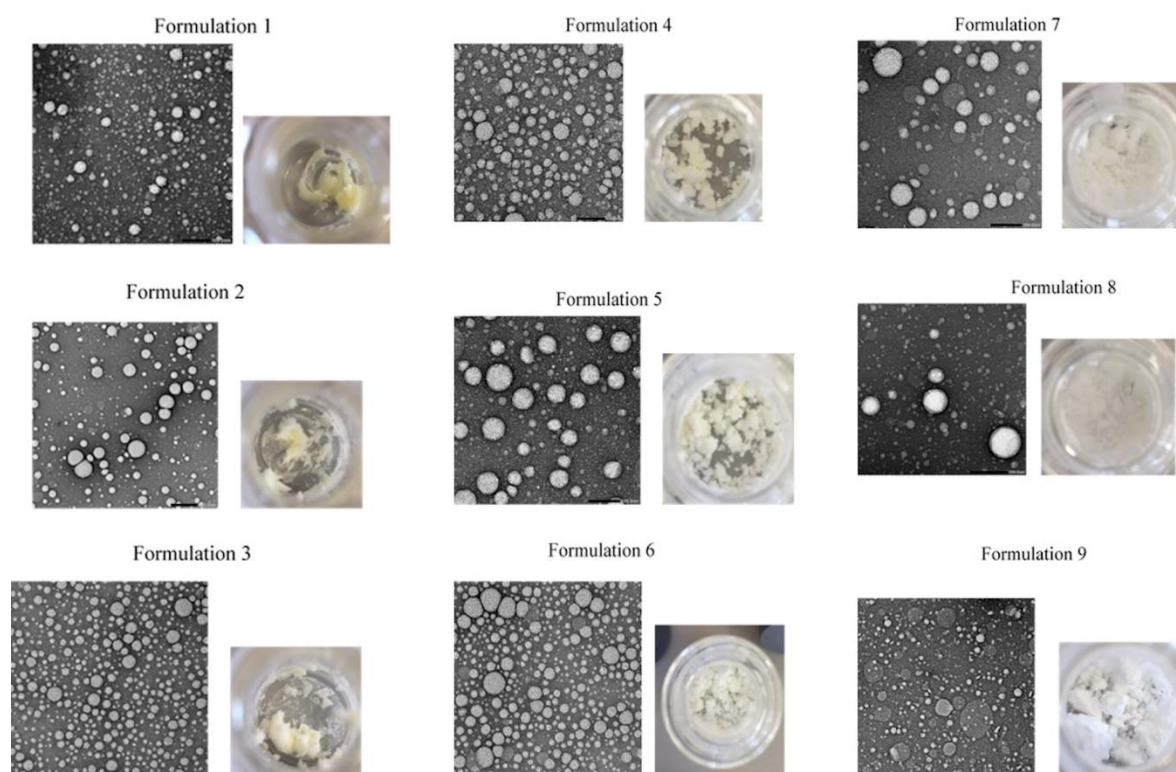

**Figure S1.** TEM micrographs and photographs of freeze-dried nanoformulations with different solid-liquid lipid ratios. The scale bar of TEM micrographs (bottom right) indicates 100 nm.

## S2. Cell Viability Assay of NLC-Empty

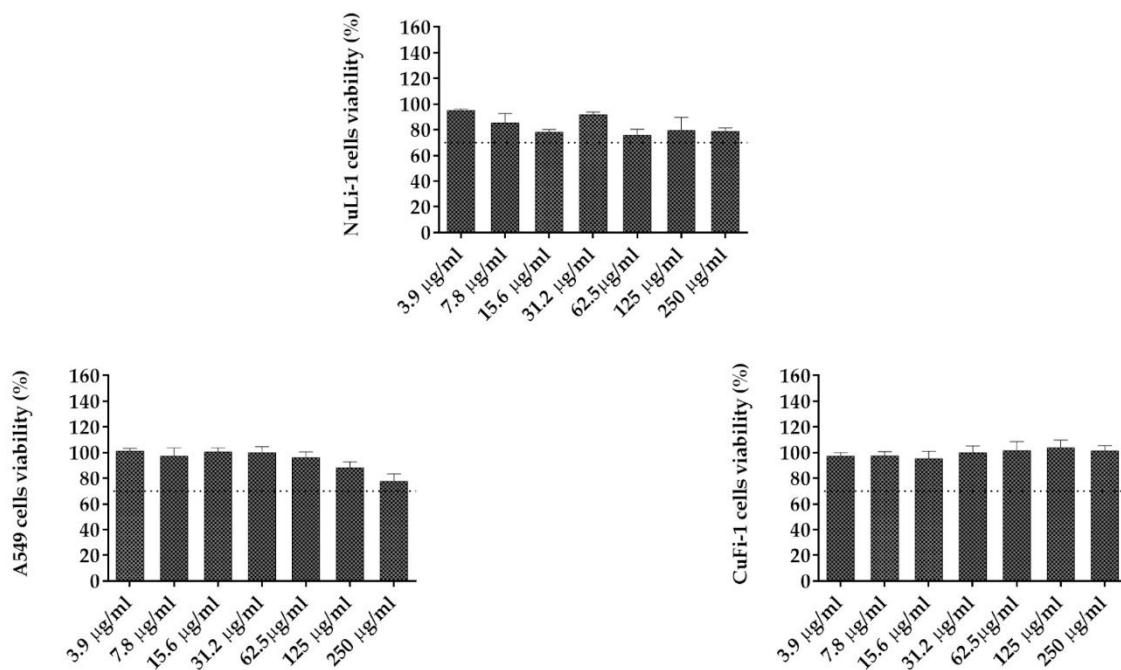

**Figure S2.** Effect of NLC-empty at different concentrations on the viability of NuLi (upper), A549 (bottom-left) and CuFi-1 (bottom-right) cells. Results are given as the mean % of living cells compared to the control  $\pm$  SD,  $n = 3$ .
